# Supplementary material
Source: publisher site journal article supplement (https://www.dovepress.com/article/478180)
Supplement: Supplementary file 1 [file get_supplementary_file.php]

**Supplementary Table 1: PubMed Search String**

|  | Query | Results |
| --- | --- | --- |
| 1 | ((((attitude[MeSH Terms]) OR (attitude)) OR (knowledge)) OR (perception)) OR (misconception) | 2,227,121 |
| 2 | (((ECT[Title/Abstract]) OR ("electroconvulsive therapy"[Title/Abstract])) OR (electroconvulsive[Title/Abstract])) OR ("electroshock therapy"[Title/Abstract]) | 15,990 |
| 3 | (((((attitude[MeSH Terms]) OR (attitude)) OR (knowledge)) OR (perception)) OR (misconception)) AND ((((ECT[Title/Abstract]) OR ("electroconvulsive therapy"[Title/Abstract])) OR (electroconvulsive[Title/Abstract])) OR ("electroshock therapy"[Title/Abstract])) | 1,148 |
| 4 | "developing country"[tw] OR "developing countries"[tw] OR "developing nation"[tw] OR "developing nations"[tw] OR "developing population"[tw] OR "developing populations"[tw] OR "developing world"[tw] OR "less developed country"[tw] OR "less developed countries"[tw] OR "less developed nation"[tw] OR "less developed nations"[tw] OR "less developed population"[tw] OR "less developed populations"[tw] OR "less developed world"[tw] OR "lesser developed country"[tw] OR "lesser developed countries"[tw] OR "lesser developed nation"[tw] OR "lesser developed nations"[tw] OR "lesser developed population"[tw] OR "lesser developed populations"[tw] OR "lesser developed world"[tw] OR "under developed country"[tw] OR "under developed countries"[tw] OR "under developed nation"[tw] OR "under developed nations"[tw] OR "under developed population"[tw] OR "under developed populations"[tw] OR "under developed world"[tw] OR "underdeveloped country"[tw] OR "underdeveloped countries"[tw] OR "underdeveloped nation"[tw] OR "underdeveloped nations"[tw] OR "underdeveloped population"[tw] OR "underdeveloped populations"[tw] OR "underdeveloped world"[tw] OR "middle income country"[tw] OR "middle income countries"[tw] OR "middle income nation"[tw] OR "middle income nations"[tw] OR "middle income population"[tw] OR "middle income populations"[tw] OR "low income country"[tw] OR "low income countries"[tw] OR "low income nation"[tw] OR "low income nations"[tw] OR "low income population"[tw] OR "low income populations"[tw] OR "lower income country"[tw] OR "lower income countries"[tw] OR "lower income nation"[tw] OR "lower income nations"[tw] OR "lower income population"[tw] OR "lower income populations"[tw] OR "underserved country"[tw] OR "underserved countries"[tw] OR "underserved nation"[tw] OR "underserved nations"[tw] OR "underserved population"[tw] OR "underserved populations"[tw] OR "underserved world"[tw] OR "under served country"[tw] OR "under served countries"[tw] OR "under served nation"[tw] OR "under served nations"[tw] OR "under served population"[tw] OR "under served populations"[tw] OR "under served world"[tw] OR "deprived country"[tw] OR "deprived countries"[tw] OR "deprived nation"[tw] OR "deprived nations"[tw] OR "deprived population"[tw] OR "deprived populations"[tw] OR "deprived world"[tw] OR "poor country"[tw] OR "poor countries"[tw] OR "poor nation"[tw] OR "poor nations"[tw] OR "poor population"[tw] OR "poor populations"[tw] OR "poor world"[tw] OR "poorer country"[tw] OR "poorer countries"[tw] OR "poorer nation"[tw] OR "poorer nations"[tw] OR "poorer population"[tw] OR "poorer populations"[tw] OR "poorer world"[tw] OR "developing economy"[tw] OR "developing economies"[tw] OR "less developed economy"[tw] OR "less developed economies"[tw] OR "lesser developed economy"[tw] OR "lesser developed economies"[tw] OR "under developed economy"[tw] OR "under developed economies"[tw] OR "underdeveloped economy"[tw] OR "underdeveloped economies"[tw] OR "middle income economy"[tw] OR "middle income economies"[tw] OR "low income economy"[tw] OR "low income economies"[tw] OR "lower income economy"[tw] OR "lower income economies"[tw] OR "low gdp"[tw] OR "low gnp"[tw] OR "low gross domestic"[tw] OR "low gross national"[tw] OR "lower gdp"[tw] OR "lower gnp"[tw] OR "lower gross domestic"[tw] OR "lower gross national"[tw] OR lmic[tw] OR lmics[tw] OR "third world"[tw] OR "lami country"[tw] OR "lami countries"[tw] OR "transitional country"[tw] OR "transitional countries"[tw] OR Africa[tw] OR Asia[tw] OR Caribbean[tw] OR West Indies[tw] OR South America[tw] OR Latin America[tw] OR Central America[tw] OR Afghanistan[tw] OR Albania[tw] OR Algeria[tw] OR Angola[tw] OR Antigua[tw] OR Barbuda[tw] OR Argentina[tw] OR Armenia[tw] OR Armenian[tw] OR Aruba[tw] OR Azerbaijan[tw] OR Bahrain[tw] OR Bangladesh[tw] OR Barbados[tw] OR Benin[tw] OR Byelarus[tw] OR Byelorussian[tw] OR Belarus[tw] OR Belorussian[tw] OR Belorussia[tw] OR Belize[tw] OR Bhutan[tw] OR Bolivia[tw] OR Bosnia[tw] OR Herzegovina[tw] OR Hercegovina[tw] OR Botswana[tw] OR Brasil[tw] OR Brazil[tw] OR Bulgaria[tw] OR Burkina Faso[tw] OR Burkina Fasso[tw] OR Upper Volta[tw] OR Burundi[tw] OR Urundi[tw] OR Cambodia[tw] OR Khmer Republic[tw] OR Kampuchea[tw] OR Cameroon[tw] OR Cameroons[tw] OR Cameron[tw] OR Camerons[tw] OR Cape Verde[tw] OR Central African Republic[tw] OR Chad[tw] OR Chile[tw] OR China[tw] OR Colombia[tw] OR Comoros[tw] OR Comoro Islands[tw] OR Comores[tw] OR Mayotte[tw] OR Congo[tw] OR Zaire[tw] OR Costa Rica[tw] OR Cote d'Ivoire[tw] OR Ivory Coast[tw] OR Croatia[tw] OR Cuba[tw] OR Cyprus[tw] OR Czechoslovakia[tw] OR Czech Republic[tw] OR Slovakia[tw] OR Slovak Republic[tw] OR Djibouti[tw] OR French Somaliland[tw] OR Dominica[tw] OR Dominican Republic[tw] OR East Timor[tw] OR East Timur[tw] OR Timor Leste[tw] OR Ecuador[tw] OR Egypt[tw] OR United Arab Republic[tw] OR El Salvador[tw] OR Eritrea[tw] OR Estonia[tw] OR Ethiopia[tw] OR Fiji[tw] OR Gabon[tw] OR Gabonese Republic[tw] OR Gambia[tw] OR Gaza[tw] OR Georgia Republic[tw] OR Georgian Republic[tw] OR Ghana[tw] OR Gold Coast[tw] OR Greece[tw] OR Grenada[tw] OR Guatemala[tw] OR Guinea[tw] OR Guam[tw] OR Guiana[tw] OR Guyana[tw] OR Haiti[tw] OR Honduras[tw] OR Hungary[tw] OR India[tw] OR Maldives[tw] OR Indonesia[tw] OR Iran[tw] OR Iraq[tw] OR Isle of Man[tw] OR Jamaica[tw] OR Jordan[tw] OR Kazakhstan[tw] OR Kazakh[tw] OR Kenya[tw] OR Kiribati[tw] OR Korea[tw] OR Kosovo[tw] OR Kyrgyzstan[tw] OR Kirghizia[tw] OR Kyrgyz Republic[tw] OR Kirghiz[tw] OR Kirgizstan[tw] OR "Lao PDR"[tw] OR Laos[tw] OR Latvia[tw] OR Lebanon[tw] OR Lesotho[tw] OR Basutoland[tw] OR Liberia[tw] OR Libya[tw] OR Lithuania[tw] OR Macedonia[tw] OR Madagascar[tw] OR Malagasy Republic[tw] OR Malaysia[tw] OR Malaya[tw] OR Malay[tw] OR Sabah[tw] OR Sarawak[tw] OR Malawi[tw] OR Nyasaland[tw] OR Mali[tw] OR Malta[tw] OR Marshall Islands[tw] OR Mauritania[tw] OR Mauritius[tw] OR Agalega Islands[tw] OR Mexico[tw] OR Micronesia[tw] OR Middle East[tw] OR Moldova[tw] OR Moldovia[tw] OR Moldovian[tw] OR Mongolia[tw] OR Montenegro[tw] OR Morocco[tw] OR Ifni[tw] OR Mozambique[tw] OR Myanmar[tw] OR Myanma[tw] OR Burma[tw] OR Namibia[tw] OR Nepal[tw] OR Netherlands Antilles[tw] OR New Caledonia[tw] OR Nicaragua[tw] OR Niger[tw] OR Nigeria[tw] OR Northern Mariana Islands[tw] OR Oman[tw] OR Muscat[tw] OR Pakistan[tw] OR Palau[tw] OR Palestine[tw] OR Panama[tw] OR Paraguay[tw] OR Peru[tw] OR Philippines[tw] OR Philipines[tw] OR Phillipines[tw] OR Phillippines[tw] OR Poland[tw] OR Portugal[tw] OR Puerto Rico[tw] OR Romania[tw] OR Rumania[tw] OR Roumania[tw] OR Russia[tw] OR Russian[tw] OR Rwanda[tw] OR Ruanda[tw] OR Saint Kitts[tw] OR St Kitts[tw] OR Nevis[tw] OR Saint Lucia[tw] OR St Lucia[tw] OR Saint Vincent[tw] OR St Vincent[tw] OR Grenadines[tw] OR Samoa[tw] OR Samoan Islands[tw] OR Navigator Island[tw] OR Navigator Islands[tw] OR Sao Tome[tw] OR Saudi Arabia[tw] OR Senegal[tw] OR Serbia[tw] OR Montenegro[tw] OR Seychelles[tw] OR Sierra Leone[tw] OR Slovenia[tw] OR Sri Lanka[tw] OR Ceylon[tw] OR Solomon Islands[tw] OR Somalia[tw] OR Sudan[tw] OR Suriname[tw] OR Surinam[tw] OR Swaziland[tw] OR Syria[tw] OR Tajikistan[tw] OR Tadzhikistan[tw] OR Tadjikistan[tw] OR Tadzhik[tw] OR Tanzania[tw] OR Thailand[tw] OR Togo[tw] OR Togolese Republic[tw] OR Tonga[tw] OR Trinidad[tw] OR Tobago[tw] OR Tunisia[tw] OR Turkey[tw] OR Turkmenistan[tw] OR Turkmen[tw] OR Uganda[tw] OR Ukraine[tw] OR Uruguay[tw] OR USSR[tw] OR Soviet Union[tw] OR Union of Soviet Socialist Republics[tw] OR Uzbekistan[tw] OR Uzbek OR Vanuatu[tw] OR New Hebrides[tw] OR Venezuela[tw] OR Vietnam[tw] OR Viet Nam[tw] OR West Bank[tw] OR Yemen[tw] OR Yugoslavia[tw] OR Zambia[tw] OR Zimbabwe[tw] OR Rhodesia[tw] OR Developing Countries[Mesh:noexp] OR Africa[Mesh:noexp] OR Africa, Northern[Mesh:noexp] OR Africa South of the Sahara[Mesh:noexp] OR Africa, Central[Mesh:noexp] OR Africa, Eastern[Mesh:noexp] OR Africa, Southern[Mesh:noexp] OR Africa, Western[Mesh:noexp] OR Asia[Mesh:noexp] OR Asia, Central[Mesh:noexp] OR Asia, Southeastern[Mesh:noexp] OR Asia, Western[Mesh:noexp] OR Caribbean Region[Mesh:noexp] OR West Indies[Mesh:noexp] OR South America[Mesh:noexp] OR Latin America[Mesh:noexp] OR Central America[Mesh:noexp] OR Afghanistan[Mesh:noexp] OR Albania[Mesh:noexp] OR Algeria[Mesh:noexp] OR American Samoa[Mesh:noexp] OR Angola[Mesh:noexp] OR "Antigua and Barbuda"[Mesh:noexp] OR Argentina[Mesh:noexp] OR Armenia[Mesh:noexp] OR Azerbaijan[Mesh:noexp] OR Bahrain[Mesh:noexp] OR Bangladesh[Mesh:noexp] OR Barbados[Mesh:noexp] OR Benin[Mesh:noexp] OR Byelarus[Mesh:noexp] OR Belize[Mesh:noexp] OR Bhutan[Mesh:noexp] OR Bolivia[Mesh:noexp] OR Bosnia- Herzegovina[Mesh:noexp] OR Botswana[Mesh:noexp] OR Brazil[Mesh:noexp] OR Bulgaria[Mesh:noexp] OR Burkina Faso[Mesh:noexp] OR Burundi[Mesh:noexp] OR Cambodia[Mesh:noexp] OR Cameroon[Mesh:noexp] OR Cape Verde[Mesh:noexp] OR Central African Republic[Mesh:noexp] OR Chad[Mesh:noexp] OR Chile[Mesh:noexp] OR China[Mesh:noexp] OR Colombia[Mesh:noexp] OR Comoros[Mesh:noexp] OR Congo[Mesh:noexp] OR Costa Rica[Mesh:noexp] OR Cote d'Ivoire[Mesh:noexp] OR Croatia[Mesh:noexp] OR Cuba[Mesh:noexp] OR Cyprus[Mesh:noexp] OR Czechoslovakia[Mesh:noexp] OR Czech Republic[Mesh:noexp] OR Slovakia[Mesh:noexp] OR Djibouti[Mesh:noexp] OR "Democratic Republic of the Congo"[Mesh:noexp] OR Dominica[Mesh:noexp] OR Dominican Republic[Mesh:noexp] OR East Timor[Mesh:noexp] OR Ecuador[Mesh:noexp] OR Egypt[Mesh:noexp] OR El Salvador[Mesh:noexp] OR Eritrea[Mesh:noexp] OR Estonia[Mesh:noexp] OR Ethiopia[Mesh:noexp] OR Fiji[Mesh:noexp] OR Gabon[Mesh:noexp] OR Gambia[Mesh:noexp] OR "Georgia (Republic)"[Mesh:noexp] OR Ghana[Mesh:noexp] OR Greece[Mesh:noexp] OR Grenada[Mesh:noexp] OR Guatemala[Mesh:noexp] OR Guinea[Mesh:noexp] OR Guinea- Bissau[Mesh:noexp] OR Guam[Mesh:noexp] OR Guyana[Mesh:noexp] OR Haiti[Mesh:noexp] OR Honduras[Mesh:noexp] OR Hungary[Mesh:noexp] OR India[Mesh:noexp] OR Indonesia[Mesh:noexp] OR Iran[Mesh:noexp] OR Iraq[Mesh:noexp] OR Jamaica[Mesh:noexp] OR Jordan[Mesh:noexp] OR Kazakhstan[Mesh:noexp] OR Kenya[Mesh:noexp] OR Korea[Mesh:noexp] OR Kosovo[Mesh:noexp] OR Kyrgyzstan[Mesh:noexp] OR Laos[Mesh:noexp] OR Latvia[Mesh:noexp] OR Lebanon[Mesh:noexp] OR Lesotho[Mesh:noexp] OR Liberia[Mesh:noexp] OR Libya[Mesh:noexp] OR Lithuania[Mesh:noexp] OR Macedonia[Mesh:noexp] OR Madagascar[Mesh:noexp] OR Malaysia[Mesh:noexp] OR Malawi[Mesh:noexp] OR Mali[Mesh:noexp] OR Malta[Mesh:noexp] OR Mauritania[Mesh:noexp] OR Mauritius[Mesh:noexp] OR Mexico[Mesh:noexp] OR Micronesia[Mesh:noexp] OR Middle East[Mesh:noexp] OR Moldova[Mesh:noexp] OR Mongolia[Mesh:noexp] OR Montenegro[Mesh:noexp] OR Morocco[Mesh:noexp] OR Mozambique[Mesh:noexp] OR Myanmar[Mesh:noexp] OR Namibia[Mesh:noexp] OR Nepal[Mesh:noexp] OR Netherlands Antilles[Mesh:noexp] OR New Caledonia[Mesh:noexp] OR Nicaragua[Mesh:noexp] OR Niger[Mesh:noexp] OR Nigeria[Mesh:noexp] OR Oman[Mesh:noexp] OR Pakistan[Mesh:noexp] OR Palau[Mesh:noexp] OR Panama[Mesh:noexp] OR Papua New Guinea[Mesh:noexp] OR Paraguay[Mesh:noexp] OR Peru[Mesh:noexp] OR Philippines[Mesh:noexp] OR Poland[Mesh:noexp] OR Portugal[Mesh:noexp] OR Puerto Rico[Mesh:noexp] OR Romania[Mesh:noexp] OR Russia[Mesh:noexp] OR "Russia (Pre- 1917)"[Mesh:noexp] OR Rwanda[Mesh:noexp] OR "Saint Kitts and Nevis"[Mesh:noexp] OR Saint Lucia[Mesh:noexp] OR "Saint Vincent and the Grenadines"[Mesh:noexp] OR Samoa[Mesh:noexp] OR Saudi Arabia[Mesh:noexp] OR Senegal[Mesh:noexp] OR Serbia[Mesh:noexp] OR Montenegro[Mesh:noexp] OR Seychelles[Mesh:noexp] OR Sierra Leone[Mesh:noexp] OR Slovenia[Mesh:noexp] OR Sri Lanka[Mesh:noexp] OR Somalia[Mesh:noexp] OR South Africa[Mesh:noexp] OR Sudan[Mesh:noexp] OR Suriname[Mesh:noexp] OR Swaziland[Mesh:noexp] OR Syria[Mesh:noexp] OR Tajikistan[Mesh:noexp] OR Tanzania[Mesh:noexp] OR Thailand[Mesh:noexp] OR Togo[Mesh:noexp] OR Tonga[Mesh:noexp] OR "Trinidad and Tobago"[Mesh:noexp] OR Tunisia[Mesh:noexp] OR Turkey[Mesh:noexp] OR Turkmenistan[Mesh:noexp] OR Uganda[Mesh:noexp] OR Ukraine[Mesh:noexp] OR Uruguay[Mesh:noexp] OR USSR[Mesh:noexp] OR Uzbekistan[Mesh:noexp] OR Vanuatu[Mesh:noexp] OR Venezuela[Mesh:noexp] OR Vietnam[Mesh:noexp] OR Yemen[Mesh:noexp] OR Yugoslavia[Mesh:noexp] OR Zambia[Mesh:noexp] OR Zimbabwe[Mesh:noexp] | 2,572,669 |
| 5 | ((((((attitude[MeSH Terms]) OR (attitude)) OR (knowledge)) OR (perception)) OR (misconception)) AND ((((ECT[Title/Abstract]) OR ("electroconvulsive therapy"[Title/Abstract])) OR (electroconvulsive[Title/Abstract])) OR ("electroshock therapy"[Title/Abstract]))) AND ("developing country"[tw] OR "developing countries"[tw] OR "developing nation"[tw] OR "developing nations"[tw] OR "developing population"[tw] OR "developing populations"[tw] OR "developing world"[tw] OR "less developed country"[tw] OR "less developed countries"[tw] OR "less developed nation"[tw] OR "less developed nations"[tw] OR "less developed population"[tw] OR "less developed populations"[tw] OR "less developed world"[tw] OR "lesser developed country"[tw] OR "lesser developed countries"[tw] OR "lesser developed nation"[tw] OR "lesser developed nations"[tw] OR "lesser developed population"[tw] OR "lesser developed populations"[tw] OR "lesser developed world"[tw] OR "under developed country"[tw] OR "under developed countries"[tw] OR "under developed nation"[tw] OR "under developed nations"[tw] OR "under developed population"[tw] OR "under developed populations"[tw] OR "under developed world"[tw] OR "underdeveloped country"[tw] OR "underdeveloped countries"[tw] OR "underdeveloped nation"[tw] OR "underdeveloped nations"[tw] OR "underdeveloped population"[tw] OR "underdeveloped populations"[tw] OR "underdeveloped world"[tw] OR "middle income country"[tw] OR "middle income countries"[tw] OR "middle income nation"[tw] OR "middle income nations"[tw] OR "middle income population"[tw] OR "middle income populations"[tw] OR "low income country"[tw] OR "low income countries"[tw] OR "low income nation"[tw] OR "low income nations"[tw] OR "low income population"[tw] OR "low income populations"[tw] OR "lower income country"[tw] OR "lower income countries"[tw] OR "lower income nation"[tw] OR "lower income nations"[tw] OR "lower income population"[tw] OR "lower income populations"[tw] OR "underserved country"[tw] OR "underserved countries"[tw] OR "underserved nation"[tw] OR "underserved nations"[tw] OR "underserved population"[tw] OR "underserved populations"[tw] OR "underserved world"[tw] OR "under served country"[tw] OR "under served countries"[tw] OR "under served nation"[tw] OR "under served nations"[tw] OR "under served population"[tw] OR "under served populations"[tw] OR "under served world"[tw] OR "deprived country"[tw] OR "deprived countries"[tw] OR "deprived nation"[tw] OR "deprived nations"[tw] OR "deprived population"[tw] OR "deprived populations"[tw] OR "deprived world"[tw] OR "poor country"[tw] OR "poor countries"[tw] OR "poor nation"[tw] OR "poor nations"[tw] OR "poor population"[tw] OR "poor populations"[tw] OR "poor world"[tw] OR "poorer country"[tw] OR "poorer countries"[tw] OR "poorer nation"[tw] OR "poorer nations"[tw] OR "poorer population"[tw] OR "poorer populations"[tw] OR "poorer world"[tw] OR "developing economy"[tw] OR "developing economies"[tw] OR "less developed economy"[tw] OR "less developed economies"[tw] OR "lesser developed economy"[tw] OR "lesser developed economies"[tw] OR "under developed economy"[tw] OR "under developed economies"[tw] OR "underdeveloped economy"[tw] OR "underdeveloped economies"[tw] OR "middle income economy"[tw] OR "middle income economies"[tw] OR "low income economy"[tw] OR "low income economies"[tw] OR "lower income economy"[tw] OR "lower income economies"[tw] OR "low gdp"[tw] OR "low gnp"[tw] OR "low gross domestic"[tw] OR "low gross national"[tw] OR "lower gdp"[tw] OR "lower gnp"[tw] OR "lower gross domestic"[tw] OR "lower gross national"[tw] OR lmic[tw] OR lmics[tw] OR "third world"[tw] OR "lami country"[tw] OR "lami countries"[tw] OR "transitional country"[tw] OR "transitional countries"[tw] OR Africa[tw] OR Asia[tw] OR Caribbean[tw] OR West Indies[tw] OR South America[tw] OR Latin America[tw] OR Central America[tw] OR Afghanistan[tw] OR Albania[tw] OR Algeria[tw] OR Angola[tw] OR Antigua[tw] OR Barbuda[tw] OR Argentina[tw] OR Armenia[tw] OR Armenian[tw] OR Aruba[tw] OR Azerbaijan[tw] OR Bahrain[tw] OR Bangladesh[tw] OR Barbados[tw] OR Benin[tw] OR Byelarus[tw] OR Byelorussian[tw] OR Belarus[tw] OR Belorussian[tw] OR Belorussia[tw] OR Belize[tw] OR Bhutan[tw] OR Bolivia[tw] OR Bosnia[tw] OR Herzegovina[tw] OR Hercegovina[tw] OR Botswana[tw] OR Brasil[tw] OR Brazil[tw] OR Bulgaria[tw] OR Burkina Faso[tw] OR Burkina Fasso[tw] OR Upper Volta[tw] OR Burundi[tw] OR Urundi[tw] OR Cambodia[tw] OR Khmer Republic[tw] OR Kampuchea[tw] OR Cameroon[tw] OR Cameroons[tw] OR Cameron[tw] OR Camerons[tw] OR Cape Verde[tw] OR Central African Republic[tw] OR Chad[tw] OR Chile[tw] OR China[tw] OR Colombia[tw] OR Comoros[tw] OR Comoro Islands[tw] OR Comores[tw] OR Mayotte[tw] OR Congo[tw] OR Zaire[tw] OR Costa Rica[tw] OR Cote d'Ivoire[tw] OR Ivory Coast[tw] OR Croatia[tw] OR Cuba[tw] OR Cyprus[tw] OR Czechoslovakia[tw] OR Czech Republic[tw] OR Slovakia[tw] OR Slovak Republic[tw] OR Djibouti[tw] OR French Somaliland[tw] OR Dominica[tw] OR Dominican Republic[tw] OR East Timor[tw] OR East Timur[tw] OR Timor Leste[tw] OR Ecuador[tw] OR Egypt[tw] OR United Arab Republic[tw] OR El Salvador[tw] OR Eritrea[tw] OR Estonia[tw] OR Ethiopia[tw] OR Fiji[tw] OR Gabon[tw] OR Gabonese Republic[tw] OR Gambia[tw] OR Gaza[tw] OR Georgia Republic[tw] OR Georgian Republic[tw] OR Ghana[tw] OR Gold Coast[tw] OR Greece[tw] OR Grenada[tw] OR Guatemala[tw] OR Guinea[tw] OR Guam[tw] OR Guiana[tw] OR Guyana[tw] OR Haiti[tw] OR Honduras[tw] OR Hungary[tw] OR India[tw] OR Maldives[tw] OR Indonesia[tw] OR Iran[tw] OR Iraq[tw] OR Isle of Man[tw] OR Jamaica[tw] OR Jordan[tw] OR Kazakhstan[tw] OR Kazakh[tw] OR Kenya[tw] OR Kiribati[tw] OR Korea[tw] OR Kosovo[tw] OR Kyrgyzstan[tw] OR Kirghizia[tw] OR Kyrgyz Republic[tw] OR Kirghiz[tw] OR Kirgizstan[tw] OR "Lao PDR"[tw] OR Laos[tw] OR Latvia[tw] OR Lebanon[tw] OR Lesotho[tw] OR Basutoland[tw] OR Liberia[tw] OR Libya[tw] OR Lithuania[tw] OR Macedonia[tw] OR Madagascar[tw] OR Malagasy Republic[tw] OR Malaysia[tw] OR Malaya[tw] OR Malay[tw] OR Sabah[tw] OR Sarawak[tw] OR Malawi[tw] OR Nyasaland[tw] OR Mali[tw] OR Malta[tw] OR Marshall Islands[tw] OR Mauritania[tw] OR Mauritius[tw] OR Agalega Islands[tw] OR Mexico[tw] OR Micronesia[tw] OR Middle East[tw] OR Moldova[tw] OR Moldovia[tw] OR Moldovian[tw] OR Mongolia[tw] OR Montenegro[tw] OR Morocco[tw] OR Ifni[tw] OR Mozambique[tw] OR Myanmar[tw] OR Myanma[tw] OR Burma[tw] OR Namibia[tw] OR Nepal[tw] OR Netherlands Antilles[tw] OR New Caledonia[tw] OR Nicaragua[tw] OR Niger[tw] OR Nigeria[tw] OR Northern Mariana Islands[tw] OR Oman[tw] OR Muscat[tw] OR Pakistan[tw] OR Palau[tw] OR Palestine[tw] OR Panama[tw] OR Paraguay[tw] OR Peru[tw] OR Philippines[tw] OR Philipines[tw] OR Phillipines[tw] OR Phillippines[tw] OR Poland[tw] OR Portugal[tw] OR Puerto Rico[tw] OR Romania[tw] OR Rumania[tw] OR Roumania[tw] OR Russia[tw] OR Russian[tw] OR Rwanda[tw] OR Ruanda[tw] OR Saint Kitts[tw] OR St Kitts[tw] OR Nevis[tw] OR Saint Lucia[tw] OR St Lucia[tw] OR Saint Vincent[tw] OR St Vincent[tw] OR Grenadines[tw] OR Samoa[tw] OR Samoan Islands[tw] OR Navigator Island[tw] OR Navigator Islands[tw] OR Sao Tome[tw] OR Saudi Arabia[tw] OR Senegal[tw] OR Serbia[tw] OR Montenegro[tw] OR Seychelles[tw] OR Sierra Leone[tw] OR Slovenia[tw] OR Sri Lanka[tw] OR Ceylon[tw] OR Solomon Islands[tw] OR Somalia[tw] OR Sudan[tw] OR Suriname[tw] OR Surinam[tw] OR Swaziland[tw] OR Syria[tw] OR Tajikistan[tw] OR Tadzhikistan[tw] OR Tadjikistan[tw] OR Tadzhik[tw] OR Tanzania[tw] OR Thailand[tw] OR Togo[tw] OR Togolese Republic[tw] OR Tonga[tw] OR Trinidad[tw] OR Tobago[tw] OR Tunisia[tw] OR Turkey[tw] OR Turkmenistan[tw] OR Turkmen[tw] OR Uganda[tw] OR Ukraine[tw] OR Uruguay[tw] OR USSR[tw] OR Soviet Union[tw] OR Union of Soviet Socialist Republics[tw] OR Uzbekistan[tw] OR Uzbek OR Vanuatu[tw] OR New Hebrides[tw] OR Venezuela[tw] OR Vietnam[tw] OR Viet Nam[tw] OR West Bank[tw] OR Yemen[tw] OR Yugoslavia[tw] OR Zambia[tw] OR Zimbabwe[tw] OR Rhodesia[tw] OR Developing Countries[Mesh:noexp] OR Africa[Mesh:noexp] OR Africa, Northern[Mesh:noexp] OR Africa South of the Sahara[Mesh:noexp] OR Africa, Central[Mesh:noexp] OR Africa, Eastern[Mesh:noexp] OR Africa, Southern[Mesh:noexp] OR Africa, Western[Mesh:noexp] OR Asia[Mesh:noexp] OR Asia, Central[Mesh:noexp] OR Asia, Southeastern[Mesh:noexp] OR Asia, Western[Mesh:noexp] OR Caribbean Region[Mesh:noexp] OR West Indies[Mesh:noexp] OR South America[Mesh:noexp] OR Latin America[Mesh:noexp] OR Central America[Mesh:noexp] OR Afghanistan[Mesh:noexp] OR Albania[Mesh:noexp] OR Algeria[Mesh:noexp] OR American Samoa[Mesh:noexp] OR Angola[Mesh:noexp] OR "Antigua and Barbuda"[Mesh:noexp] OR Argentina[Mesh:noexp] OR Armenia[Mesh:noexp] OR Azerbaijan[Mesh:noexp] OR Bahrain[Mesh:noexp] OR Bangladesh[Mesh:noexp] OR Barbados[Mesh:noexp] OR Benin[Mesh:noexp] OR Byelarus[Mesh:noexp] OR Belize[Mesh:noexp] OR Bhutan[Mesh:noexp] OR Bolivia[Mesh:noexp] OR Bosnia- Herzegovina[Mesh:noexp] OR Botswana[Mesh:noexp] OR Brazil[Mesh:noexp] OR Bulgaria[Mesh:noexp] OR Burkina Faso[Mesh:noexp] OR Burundi[Mesh:noexp] OR Cambodia[Mesh:noexp] OR Cameroon[Mesh:noexp] OR Cape Verde[Mesh:noexp] OR Central African Republic[Mesh:noexp] OR Chad[Mesh:noexp] OR Chile[Mesh:noexp] OR China[Mesh:noexp] OR Colombia[Mesh:noexp] OR Comoros[Mesh:noexp] OR Congo[Mesh:noexp] OR Costa Rica[Mesh:noexp] OR Cote d'Ivoire[Mesh:noexp] OR Croatia[Mesh:noexp] OR Cuba[Mesh:noexp] OR Cyprus[Mesh:noexp] OR Czechoslovakia[Mesh:noexp] OR Czech Republic[Mesh:noexp] OR Slovakia[Mesh:noexp] OR Djibouti[Mesh:noexp] OR "Democratic Republic of the Congo"[Mesh:noexp] OR Dominica[Mesh:noexp] OR Dominican Republic[Mesh:noexp] OR East Timor[Mesh:noexp] OR Ecuador[Mesh:noexp] OR Egypt[Mesh:noexp] OR El Salvador[Mesh:noexp] OR Eritrea[Mesh:noexp] OR Estonia[Mesh:noexp] OR Ethiopia[Mesh:noexp] OR Fiji[Mesh:noexp] OR Gabon[Mesh:noexp] OR Gambia[Mesh:noexp] OR "Georgia (Republic)"[Mesh:noexp] OR Ghana[Mesh:noexp] OR Greece[Mesh:noexp] OR Grenada[Mesh:noexp] OR Guatemala[Mesh:noexp] OR Guinea[Mesh:noexp] OR Guinea- Bissau[Mesh:noexp] OR Guam[Mesh:noexp] OR Guyana[Mesh:noexp] OR Haiti[Mesh:noexp] OR Honduras[Mesh:noexp] OR Hungary[Mesh:noexp] OR India[Mesh:noexp] OR Indonesia[Mesh:noexp] OR Iran[Mesh:noexp] OR Iraq[Mesh:noexp] OR Jamaica[Mesh:noexp] OR Jordan[Mesh:noexp] OR Kazakhstan[Mesh:noexp] OR Kenya[Mesh:noexp] OR Korea[Mesh:noexp] OR Kosovo[Mesh:noexp] OR Kyrgyzstan[Mesh:noexp] OR Laos[Mesh:noexp] OR Latvia[Mesh:noexp] OR Lebanon[Mesh:noexp] OR Lesotho[Mesh:noexp] OR Liberia[Mesh:noexp] OR Libya[Mesh:noexp] OR Lithuania[Mesh:noexp] OR Macedonia[Mesh:noexp] OR Madagascar[Mesh:noexp] OR Malaysia[Mesh:noexp] OR Malawi[Mesh:noexp] OR Mali[Mesh:noexp] OR Malta[Mesh:noexp] OR Mauritania[Mesh:noexp] OR Mauritius[Mesh:noexp] OR Mexico[Mesh:noexp] OR Micronesia[Mesh:noexp] OR Middle East[Mesh:noexp] OR Moldova[Mesh:noexp] OR Mongolia[Mesh:noexp] OR Montenegro[Mesh:noexp] OR Morocco[Mesh:noexp] OR Mozambique[Mesh:noexp] OR Myanmar[Mesh:noexp] OR Namibia[Mesh:noexp] OR Nepal[Mesh:noexp] OR Netherlands Antilles[Mesh:noexp] OR New Caledonia[Mesh:noexp] OR Nicaragua[Mesh:noexp] OR Niger[Mesh:noexp] OR Nigeria[Mesh:noexp] OR Oman[Mesh:noexp] OR Pakistan[Mesh:noexp] OR Palau[Mesh:noexp] OR Panama[Mesh:noexp] OR Papua New Guinea[Mesh:noexp] OR Paraguay[Mesh:noexp] OR Peru[Mesh:noexp] OR Philippines[Mesh:noexp] OR Poland[Mesh:noexp] OR Portugal[Mesh:noexp] OR Puerto Rico[Mesh:noexp] OR Romania[Mesh:noexp] OR Russia[Mesh:noexp] OR "Russia (Pre- 1917)"[Mesh:noexp] OR Rwanda[Mesh:noexp] OR "Saint Kitts and Nevis"[Mesh:noexp] OR Saint Lucia[Mesh:noexp] OR "Saint Vincent and the Grenadines"[Mesh:noexp] OR Samoa[Mesh:noexp] OR Saudi Arabia[Mesh:noexp] OR Senegal[Mesh:noexp] OR Serbia[Mesh:noexp] OR Montenegro[Mesh:noexp] OR Seychelles[Mesh:noexp] OR Sierra Leone[Mesh:noexp] OR Slovenia[Mesh:noexp] OR Sri Lanka[Mesh:noexp] OR Somalia[Mesh:noexp] OR South Africa[Mesh:noexp] OR Sudan[Mesh:noexp] OR Suriname[Mesh:noexp] OR Swaziland[Mesh:noexp] OR Syria[Mesh:noexp] OR Tajikistan[Mesh:noexp] OR Tanzania[Mesh:noexp] OR Thailand[Mesh:noexp] OR Togo[Mesh:noexp] OR Tonga[Mesh:noexp] OR "Trinidad and Tobago"[Mesh:noexp] OR Tunisia[Mesh:noexp] OR Turkey[Mesh:noexp] OR Turkmenistan[Mesh:noexp] OR Uganda[Mesh:noexp] OR Ukraine[Mesh:noexp] OR Uruguay[Mesh:noexp] OR USSR[Mesh:noexp] OR Uzbekistan[Mesh:noexp] OR Vanuatu[Mesh:noexp] OR Venezuela[Mesh:noexp] OR Vietnam[Mesh:noexp] OR Yemen[Mesh:noexp] OR Yugoslavia[Mesh:noexp] OR Zambia[Mesh:noexp] OR Zimbabwe[Mesh:noexp]) | 122 |

**Supplementary Table 2: Risk of Bias score based on the Joanna Briggs Institute Checklists**

| **Study** | **Prevalence and incidence studies** | | | | | | | | | | | | **Cross-sectional analytical studies** | | | | | | | | |
| --- | --- | --- | --- | --- | --- | --- | --- | --- | --- | --- | --- | --- | --- | --- | --- | --- | --- | --- | --- | --- | --- |
| **1** | **2** | **3** | **4** | **5** | **6** | **7** | **8** | **9** | **Overall Score** | | | **1** | **2** | **3** | **4** | **5** | **6** | **7** | **8** | **Overall score** |
| Mausling (2017), South Africa [1] | Y | Y | Y | Y | Y | Y | Y | Y | N | 8 | | | Y | Y | Y | Y | N | N | Y | Y | 6 |
| James (2010), Nigeria [2] | Y | Y | Y | N | Y | Y | Y | Y | N | 7 | | | Y | N | Y | Y | N | N | Y | Y | 5 |
| Thabet (2011), Tunisia [3] | Y | Y | Y | Y | Y | Y | Y | Y | N | 8 | | | Y | Y | Y | Y | N | N | Y | Y | 6 |
| Abass (2007), Egypt [4] | Y | Y | N | N | Y | N | Y | Y | N | 5 | | | N | N | Y | Y | N | N | Y | Y | 4 |
| Herch (2022), Tunisia [5] | N | Y | N | N | Y | Y | Y | Y | N | 4 | | | | | | | | | | | |
| James (2013), Nigeria [6] | Y | Y | Y | Y | Y | Y | Y | Y | N | 8 | | | | | | | | | | | |
| Hussein (2019), Sudan [7] | Y | Y | Y | Y | Y | Y | Y | Y | N | 8 | | | | | | | | | | | |
| James (2010), Nigeria [8] | Y | Y | Y | N | Y | Y | Y | Y | N | 7 | | | | | | | | | | | |
| James (2009), Nigeria [9] | Y | Y | Y | N | Y | Y | Y | Y | N | 7 | | | | | | | | | | | |
| Netshilema (2019), South Africa [10] | Y | Y | Y | N | Y | Y | Y | Y | N | 7 | | | | | | | | | | | |
| **Cohort studies** | | | | | | | | | | | | | | | | | | | | | |
|  | **1** | **2** | **3** | **4** | **5** | **6** | **7** | **8** | **9** | **10** | **11** | **Overall score** | | | | | | | | | |
| James (2009), Nigeria [11] | Y | Y | Y | N | N | Y | Y | Y | Y | NA | Y | 8 | | | | | | | | | |
| **Case control studies** | | | | | | | | | | | | | | | | | | | | | |
|  | **1** | **2** | **3** | **4** | **5** | **6** | **7** | **8** | **9** | **10** | **Overall score** | | | | | | | | | | |
| Farrant (1997), Uganda [12] | Y | Y | Y | Y | Y | N | N | Y | Y | Y | 8 | | | | | | | | | | |
| **Qualitative studies** | | | | | | | | | | | | | | | | | | | | | |
|  | **1** | **2** | **3** | **4** | **5** | **6** | **7** | **8** | **9** | **10** | **Overall score** | | | | | | | | | | |
| Ali (2019), Kenya [13] | Y | Y | Y | Y | Y | Y | Y | Y | Y | Y | 10 | | | | | | | | | | |
| KEY; Y=Yes; N=No  **JBI checklist for prevalence studies;** 1. Was the sample representative of the target population? 2. Were study participants recruited in an appropriate way? 3. Was the sample size adequate? 4. Were the study subjects and setting described in detail? 5. Was data analysis conducted with sufficient coverage of the identified sample? 6. Were objective, standard criteria used for measurement of the condition? 7. Were the outcomes measured in a valid and reliable way? 8. Was appropriate statistical analysis used? 9.Were confounding factors identified and accounted for?  **JBI checklist for Analytical cross-sectional studies**; 1. Were the criteria for inclusion in the sample clearly defined? 2. Were the study subjects and the setting described in detail? 3. Was the exposure measured in a valid and reliable way? 4. Were objective, standard criteria used for measurement of the condition? 5. Were confounding factors identified? 6. Were strategies to deal with confounding factors stated? 7. Were the outcomes measured in a valid and reliable way? 8. Was appropriate statistical analysis used?  **JBI checklist for cohort studies**; 1. Were the two groups similar and recruited from the same population? 2. Were the exposures measured similarly to assign people to both exposed and unexposed groups? 3. Was the exposure measured in a valid and reliable way? 4. Were confounding factors identified? 5. Were strategies to deal with confounding factors stated? 6. Were the groups/participants free of the outcome at the start of the study (or at the moment of exposure)? 7. Were the outcomes measured in a valid and reliable way? 8. Was the follow up time reported and sufficient to be long enough for outcomes to occur? 9. Was follow up complete, and if not, were the reasons to loss to follow up described and explored? 10. Were strategies to address incomplete follow up utilized? 11. Was appropriate statistical analysis used?  **JBI checklist for case-control studies** 1. Were the groups comparable other than the presence of disease in cases or the absence of disease in controls? 2. Were cases and controls matched appropriately? 3. Were the same criteria used for identification of cases and controls? 4. Was exposure measured in a standard, valid and reliable way? 5. Was exposure measured in the same way for cases and controls? 6. Were confounding factors identified? 7. Were strategies to deal with confounding factors stated? □ □ □ □ 8. Were outcomes assessed in a standard, valid and reliable way for cases and controls? 9. Was the exposure period of interest long enough to be meaningful? 10. Was appropriate statistical analysis used?  **JBI checklist for qualitative studies;** Is there congruity between the stated philosophical perspective and the research methodology? 2. Is there congruity between the research methodology and the research question or objectives? 3. Is there congruity between the research methodology and the methods used to collect data? 4. Is there congruity between the research methodology and the representation and analysis of data? 5. Is there congruity between the research methodology and the interpretation of results? 6. Is there a statement locating the researcher culturally or theoretically? 7. Is the influence of the researcher on the research, and vice- versa, addressed? 8. Are participants, and their voices, adequately represented? 9. Is the research ethical according to current criteria or, for recent studies, and is there evidence of ethical approval by an appropriate body? 10. Do the conclusions drawn in the research report flow from the analysis, or interpretation, of the data**?** | | | | | | | | | | | | | | | | | | | | | |

**References**

1. Mausling MB, Macharia M, Jordaan GP: **Junior medical students’ knowledge about and attitudes towards electroconvulsive therapy in a South African setting**. *South African Journal of Psychiatry* 2017, **23**(1):1-6.

2. James B, Lawani A, Omoaregba J, Isa E: **Electroconvulsive therapy: a comparison of knowledge and attitudes of student nurses and staff mental health nurses at a psychiatric hospital in Nigeria**. *Journal of psychiatric and mental health nursing* 2010, **17**(2):141-146.

3. Thabet JB, Charfeddine F, Abid I, Feki I, Zouari L, Zouari N, Maâlej M: **De la réticence face à l’électroconvulsivothérapie: enquête auprès de 120 personnels soignants dans un centre hospitalo-universitaire en Tunisie**. *L'Encéphale* 2011, **37**(6):466-472.

4. Abbas M, Mashrai N, Mohanna M: **Knowledge of and attitudes toward electroconvulsive therapy of medical students in the United Kingdom, Egypt, and Iraq: a transcultural perspective**. *The Journal of ECT* 2007, **23**(4):260-264.

5. Herch N, Lansari R, Bennasr Y, Melki W: **Assessment of Knowledge and attitudes of psychiatric nurses toward electroconvulsive therapy**. *European Psychiatry* 2022, **65**(S1):S616-S616.

6. James BO, Inogbo CF: **Implementing modified electroconvulsive therapy in Nigeria: current status and psychiatrists’ attitudes**. *The Journal of ECT* 2013, **29**(2):e25-e26.

7. Hussein O: **Patients and Relatives' Perspectives about Electroconvulsive Therapy (ECT) In Khartoum, Sudan**. *Medicine & Health* 2019, **14**:242-252.

8. James BO, Morakinyo O, Lawani AO, Omoaregba JO, Olotu OS: **Unmodified electroconvulsive therapy: the perspective of patients from a developing country**. *The Journal of ECT* 2010, **26**(3):218-222.

9. James BO, Omoaregba JO, Olotu OS: **Nigerian medical students attitudes to unmodified electroconvulsive therapy**. *The journal of ECT* 2009, **25**(3):186-189.

10. Netshilema TC, Khamker N, Sokudela F: **Mental health professionals' attitudes toward and knowledge about electroconvulsive therapy at Weskoppies Hospital, South Africa**. *Perspectives in psychiatric care* 2019, **55**(2).

11. James BO, Omoaregba O, Igberase O, Olotu S: **Unmodified electroconvulsive therapy: changes in knowledge and attitudes of Nigerian medical students**. *African health sciences* 2009, **9**(4).

12. Farrant W: **ECT in underdeveloped countries**. *British Medical Journal* 1977, **2**(6091):895.

13. Ali NA, Owiti F, Kigamwa P, Kumar M: **A Qualitative Exploration of Gaps and Challenges in Knowledge and Practices of Electroconvulsive Therapy by Key Personnel in Public and Private Mental Health Units in Kenya**. *Frontiers in psychiatry* 2019, **10**:697.

**Supplementary file 3: Reasons for excluding studies.**

1. No full-text or only abstract provided. [1]
2. Assessing practices only. [2-30]

**References.**

1. Oyewumi L, Kazaria S: **Electroconvulsive therapy in Nigeria: psychiatrists attitudes, knowledge and skills**. *West African Journal of Medicine* 1994, **13**(1):43-47.

2. Abiodun OA: **Mortality in a psychiatric population: a Nigerian psychiatric hospital experience**. *Acta psychiatrica Scandinavica* 1988, **77**(6):654-657.

3. Ohaeri JU, Hedo CC, Enyidah SN, Ogunniyi AO: **Tissue injury-inducing potential of unmodified ECT: Serial measurement of acute phase reactants**. *The Journal of ECT* 1992, **8**(4):253-257.

4. Mugisha R, Ovuga E: **The use of electroconvulsive therapy in the treatment of psychiatric illness at Umzimkulu Hospital in Transkei A retrospective study**. *South African Medical Journal* 1991, **79**(4):391-393.

5. Ukpong D, Makanjuola R, Morakinyo O: **A controlled trial of modified electroconvulsive therapy in Schizophrenia in a Nigeria Teaching Hospital**. *West African Journal of Medicine* 2002, **21**(3):237-240.

6. Oladeji B: **Determinants of length of stay in the psychiatric wards of the University College Hospital, Ibadan, Nigeria**. *African journal of medicine and medical sciences* 2012, **41**(2):147-152.

7. Odejide A, Ohaeri J, Ikuesan B: **Electroconvulsive therapy in Nigeria**. *The Journal of ECT* 1987, **3**(1):31-39.

8. Shams T, El-Masry R: **Ketofol-Dexmedetomidine combination in ECT: A punch for depression and agitation**. *Indian Journal of Anaesthesia* 2014, **58**(3):275.

9. de Menil VP, Knapp M, McDaid D, Njenga FG: **Service use, charge, and access to mental healthcare in a private Kenyan inpatient setting: the effects of insurance**. *PloS one* 2014, **9**(3):e90297.

10. Ali DH, Elserafi DM, Soltan MAR, Eissa MF, Zein HA, Elshahawi HH: **Schizophrenic patients’ cognitive functions in relation to their metabolic profile: a cross-sectional, comparative study on an Egyptian sample**. *Middle East Current Psychiatry* 2020, **27**(1):1-6.

11. Ukpong D, Mosaku S: **Demographic and Clinical Correlates of Length of Stay in a Nigerian University Hospital Psychiatric Unit**. *Turkish Journal of Psychiatry* 2009, **20**(1).

12. Mechri A, Zaafrane H, Khalifa MH, Toumi S, Zaafrane F, Gaha L: **The practice of electroconvulsivotherapy at a University Hospital in Tunisia**. *PAN AFRICAN MEDICAL JOURNAL* 2018, **29**.

13. Benson-Martin J: **The scope of ECT practice in South Africa**. University of Cape Town; 2013.

14. Brahim S, Bouali W, Henia M, Abid A, Chabbouh M, Zarrouk L: **Electroconvulsive therapy in the psychiatric depatement of the Mahdia EPS over two years**. *European Psychiatry* 2021, **64**(S1):S491-S491.

15. Ihezue H, Ebigbo P: **Present status and practice of electroconvulsive therapy at the Psychiatric Hospital, Enugu, Nigeria**. *Acta psychiatrica Scandinavica* 1981, **63**(4):325-332.

16. Lerer B, Zabow T, Egnal N, Belmaker R: **Effect of vasopressin on memory following electroconvulsive therapy**. *Biological Psychiatry* 1983, **18**(7):821-824.

17. El-Deeb F, Gad E-S, Kandeel A, Haiba A, Sadek S, Youssef N: **172. Controlled Clinical Trial of Magnetic Seizure Therapy (MST) and ECT: A Medication-Free Study**. *Biological Psychiatry* 2017, **81**(10):S71-S72.

18. Udedi M: **Electroconvulsive Therapy Service Provision at Zomba Mental Hospital, Malawi**. *The Journal of ECT* 2014, **30**(4):e49-e50.

19. Selis MA, Kauye F, Leentjens AF: **The practice of electroconvulsive therapy in Malawi**. *The journal of ECT* 2008, **24**(2):137-140.

20. van Zijl DH, Gordon PC, James MF: **The comparative effects of remifentanil or magnesium sulfate versus placebo on attenuating the hemodynamic responses after electroconvulsive therapy**. *Anesthesia & Analgesia* 2005, **101**(6):1651-1655.

21. Odayar K, Eloff I, Esterhuysen W: **Clinical and demographic profile of catatonic patients who received electroconvulsive therapy in a South African setting**. *South African Journal of Psychiatry* 2018, **24**.

22. Aaron OI, Faponle AF, Bolaji BO, Mosaku SK, Adenekan AT, Oginni OA: **Modified electroconvulsive therapy in a resource-challenged setting: Comparison of two doses (0.5 mg/kg and 1 mg/kg) of suxamethonium chloride**. *Saudi Journal of Anaesthesia* 2020, **14**(4):487.

23. Plein H, Berk M: **Changes in the platelet intracellular calcium response to serotonin in patients with major depression treated with electroconvulsive therapy: state or trait marker status**. *International clinical psychopharmacology* 2000, **15**(2):93-98.

24. Latif AA, Nasreldin M, Kader AA, Fathy H, Moussa S, Basheer M, Elsheikh A, Madbouly N: **A randomized study comparing the short-term neurocognitive outcome of electroconvulsive therapy versus repetitive transcranial magnetic stimulation in the treatment of patients with depression**. *Journal of Psychiatric Practice®* 2020, **26**(1):23-36.

25. Vangu MDT, Esser JD, Boyd IH, Berk M: **Effects of electroconvulsive therapy on regional cerebral blood flow measured by 99mtechnetium HMPAO SPECT**. *Progress in Neuro-Psychopharmacology and Biological Psychiatry* 2003, **27**(1):15-19.

26. Hodgson R, Dawson P, Hold A, Rout C, Zuma K: **Anaesthesia for electroconvulsive therapy: a comparison of sevoflurane with propofol**. *Anaesthesia and intensive care* 2004, **32**(2):241-245.

27. Saffer S, Berk M: **Anesthetic induction for ECT with etomidate is associated with longer seizure duration than thiopentone**. *The Journal of ECT* 1998, **14**(2):89-93.

28. Somoye EB, Onifade PO, Oluwaranti AO, Adeniji AA: **A 10-year descriptive study of electroconvulsive therapy at the Neuropsychiatric Hospital, Aro, Abeokuta**. *The Journal of ECT* 2014, **30**(4):315-319.

29. Shahin O, Gohar SM, Ibrahim W, El-Makawi SM, Fakher W, Taher DB, Abdel Samie M, Khalil MA, Saleh AA: **Brain-Derived neurotrophic factor (BDNF) plasma level increases in patients with resistant schizophrenia treated with electroconvulsive therapy (ECT)**. *International Journal of Psychiatry in Clinical Practice* 2022, **26**(4):370-375.

30. Benson-Martin JJ, Milligan PD: **A survey of the practice of electroconvulsive therapy in South Africa**. *The Journal of ECT* 2015, **31**(4):253-257.

**Supplementary Table 4: Findings of knowledge, attitudes, and perception**

| **Author, year, origin** | **Tool used to assess KAP** | **Source of knowledge** | **Findings on knowledge** | **Findings on attitudes** | **Findings on perception** |
| --- | --- | --- | --- | --- | --- |
| Netshilema (2019), South Africa [24] | Self-administered questionnaire  -the scores on knowledge were calculated through summing the scores for the each specific question on the modified questionnaire initially developed by Kinnair, Dawson & Perera [42] for each participant throughout the sections on indications, process and adverse effects | Explanation from a psychiatrist – 78.7%  Media – 68.3%  Course / Lecture – 66.7%  Professional publications – 63.4%  Word of mouth – 31.7%  Personal experience – 31.0%  Experience from friend or relative - 12.0% | - Total mean knowledge scores per discipline - Nurse - 64.3% - Occupational therapists - 68.9% - Psychiatrists - 85.8% - Psychologists - 63.6% Social workers - 71.4% | - Mean percentage‐positive attitude scores Nurses - 83.6% - Psychiatrists - 91.1% - Psychologists - 75.0% - Occupational therapists - 75.9% - Social worker - 91.7% |  |
| Mausling (2017), South Africa [25] | Self-administered questionnaire | Internet - 61 (46.6)  TV and/or movies - 40 (30.5)  Lecture - 16 (12.2)  Explanation by another doctor - 6 (4.6)  Experience of friend and/or family - 6 (4.6)  Explanation by psychiatrist - 2 (1.5)  Professional publication - 0 | - ECT was first used in the 1930s - 81 (61.6) - ECT involves passing an electrical current through the brain - 130 (99.2) - ECT is not only used to treat depression - 124 (94.7) - Anesthetic is given during ECT - 75 (57.3) - A muscle relaxant is given prior to the administration of ECT - 89 (67.9) - The usual course of ECT is more than four sessions - 52 (39.7) - ECT should not be administered daily - 125 (95.4) - Successful ECT-induced seizure does not need to be for ≥ 5 min - 100 (76.9) - ECT does not result in permanent memory loss - 101 (77.7) - ECT does not cause personality changes - 65 (50.4) - Knowledge score (mean, SD) - 74.7 (14.9) | - Would have ECT if recommended to me: Agree 35 (26.7) - Would recommend ECT to my patients: Agree 23 (17.5) - Would feel comfortable administering ECT if adequately trained: Agree 45 (34.3) - ECT is cruel: Agree 22 (16.8) - ECT causes pain: Agree 41 (31.3) - ECT is used to punish aggressive or uncooperative patients: Agree 11 (8.4) - ECT is unsafe and may result in death: Agree 18 (13.7) - ECT causes permanent brain damage: Agree 21 (16.0) - ECT should only be used as a last resort: Agree 64 (48.9) - ECT should be illegal to perform: Agree 13 (9.9) |  |
| James (2009), Nigeria [26] | Self-administered questionnaire | - Movies - 36 (52.9)  Television - 25 (36.8)  Word of mouth - 25 (36.8)  Newspapers, magazines - 20 (29.4)  Personal experience - 1 (1.5)  Experience of a friend, relative  treated with ECT - 2 (2.9)  Formal lectures - 7 (10.2)  Information from a psychiatrist  or physician - (7 10.2)  Information from professional  publications, journals - 7 (10.2) | Knowledge after psychiatry training   - Anesthesia may be used in ECT if facilities are available - 62 (91.2) - During ECT, the jerking movements are important in treatment - 48 (70.5) - ECT is effective in the treatment of mania - 42 (61.7) - Recent myocardial infarction is a contraindication to ECT - 64 (94.1) - ECT is contraindicated in patients with seizure disorders - 17 (25) |  |  |
| Abass (2007), Egypt [27] | Self-administered anonymous questionnaire developed by the 3 researchers.  Factual knowledge about ECT, and training  experiences. Attitudes regarding a variety of aspects of ECT  were measured using a 5-point Likert Scale. | Had teaching about ECT - 15 (17.6)  Observed ECT - 3 (3.5) | - 4.7% knew 2 correct Side effects (SE) - 14.1% knew 1 correct SE. - 81.2% were unable to mention any SE. - 17.6 % knew 2 correct indications. - 5.9% knew 1 correct indication. - 76.5% were unable to mention any indication for ECT. - 36.5% knew that ECT effect is rapid. - 8.2% knew that there is no absolute contra indication for ECT | - ECT helps people – 34 (40) - ECT is a cruel treatment - 26 (31) - Psychiatrists abuse ECT – 22 (26) - ECT should never be given – 15 (18) - ECT is not dangerous – 16 (19) - ECT can cause death – 30 (35) - Accept ECT for self – 25 (29) - Accept ECT for relative – 25 (29) - Don’t want to be involved in giving it – 37 (43) - ECT is not painful - 7 (8) - Public opinion is misled by media – 60 (71) - Prefer medications – 55 (65) - Prefer psychological treatment – 52 (61) - People should not be afraid – 30 (35) - ECT can save life 34 (40) - Patient should agree before – 53 (62) - Giving ECT against will is acceptable in some cases – 42 (50) - Should only be given in an Emergency – 39 (46) - Patient should be given information before ECT- 62 (73) |  |
| James (2009), Nigeria [28] |  |  | - Knowledge of ECT   Minimal - 31 (18.7%)  Average - 93 (56.0%)  High - 42 (25.3%) | - ECT is misused: 38 (22.9%) - ECT is used in poorer populations: 46 (27.7%). - ECT is not to be used in persons older than 65 years: 66 (39.7%). - ECT should not be used in children: 76 (45.8%) - ECT is used to control violent patients: 58 (34.9%) - ECT is used to punish uncooperative patients: 6 (3.6%) - ECT is used by governments to torture political opponents: 19 (11.4%) - ECT should be illegal to perform: 17 (10.2%). - ECT is outmoded: 24(14.4%). - ECT is painful. 81 (48.8%) - ECT is dangerous. 107 (64.5%) - ECT can cause permanent brain damage.: 30 (18.1%) - ECT should be used only as a final resort: 114 (78.7%) - ECT is used often in minorities: 30 (18.1%) |  |
| Herch (2022), Tunisia [29] |  |  | - 93% of nurses reported that schizophrenia represents the most frequent indication for ECT. - All participants reported pregnancy as a contraindication. - All participants did not recognize ECT as a first line treatment | ECT is very effective – 73% |  |
| Ali (2019), Kenya [30] | Individual stakeholder-specific interview guides |  | Theme; “Cognizance of overall theory and methodology”  Among Psychiatrists & Registrars  Verbatim quotes  - “From my knowledge I think very suicidal patients, depressive patients that are very suicidal, patients who are very  unstable when they are pregnant, schizophrenia that is not responding to drugs, patients who are not able to take oral  medication, postpartum psychosis it’s actually an indication…” Registrar Psychiatrist  - “ECT works…it is a very effective treatment more so for depression and bipolar especially in mania” ” Qualified Psychiatrist  - “It’s bilateral and not unilateral, it has been deemed to be more effective than unilateral and therefore in our setting  I have never seen unilateral it’s always been bilateral” Registrar Psychiatrist |  |  |
| Farrant (1997), Uganda [31] | Self-administered questionnaire |  |  | Reason for preferring modified  For self (For patient)   - More humane -78% (36%) - Less hazardous – 34% (23%) - More convenient to administer – (45%) More modern – (10%)   Reason for preferring straight  For self (For patient)   - Less hazardous - 72% (51%) - Fear of injection – 14% - More convenient to administer – (69%) |  |
| Thabet (2011), Tunisia [32] |  |  | The overall score of knowledge  towards ECT  Patients - 54.9%  Relatives - 59.4%  The patients’ knowledge about   1. site of electric shock in body - (97.1%) 2. requiring investigations before ECT session - (94.2%), 3. the side effects of ECT - (72.8%) 4. number of weekly sessions scored - (71.8%). | Positive attitude scores  Patients – 59.1%  Relatives – 70.7% |  |
| James (2010), Nigeria [33] | Questionnaire on knowledge and attitudes to ECT (QuAKE). |  |  | Student nurses (staff nurses)   - ECT is overused -   Agree - 65% (21.3%)   - Health authorities should set guidelines for ECT practice?   Agree – 85% (57.3%)   - ECT is beneficial: In over half of patients - 56.6% (70.7%) |  |
| James (2013), Nigeria [34] | Self-administered questionnaire |  |  | All respondents expressed positive attitudes toward the modified type of ECT.  Most (69.7%) considered it safer than the unmodified type,  (63.2%) disagreed that it causes brain  damage,  (73.7%) desired that all psychiatric facilities in the  country offer the modified type | (92.2%) did not view ECT as obsolete despite advances in psychopharmacology.  (67.2%) were of the opinion that ECT should be a treatment of  last resort.  (76.4%) endorsed the view that  minimum guidelines should be introduced for ECT practice in  the country.  (51.3%) of the respondents believed  the unmodified type to be safe,  50% agreed that cost may be an impediment to the widespread use of the modified type. |
| Hussein (2019), Sudan [35] | Self-administered questionnaire |  |  | 48% would refuse to give their consent for administering ECT to a family member | Psychiatrists often resorted to ECT hastily – 16.7%  Perceived as a violent treatment by 30.8%.  Among paramedical staff, 71.7% would refuse to participate in an ECT session,  Among physicians, 58.3% would not resort to this treatment if indicated. |
| James (2010), Nigeria [36] | Self-administered questionnaire |  |  |  | Perspectives of the ECT Procedure   - Did you find the procedure stressful? -   Yes, a little but what I expected 10 (11.1)  Yes, very 16 (17.8)  The most stressful thing imaginable 6 (6.7)   - Were you given any information in explaining what happens during ECT?   Yes 10 (11.1)   - Did staff in the ECT suite explain the procedure to you?   Yes 14 (15.6)  Perspectives About a Typical Treatment Day Before Receiving ECT   - Were you accompanied to the ECT suite by a member of staff? - Yes 76 (84.4) - Did the accompanying member of staff stay with you throughout treatment? - Yes 68 (75.5) - Did you know the member of staff accompanying you? - Yes 38 (42.2) - Were you introduced to all those who would be present during treatment? - Yes 16 (17.8) - Were staff friendly and reassuring? - Yes 54 (60) - Was the clinic clean and comfortable? - Yes 74 (82.2)   Perspectives After ECT   - Had you a headache after ECT?   Yes 8 (8.9)   - Did you have pains in your muscles afterwards?   Yes 16 (17.8)   - Was your memory affected?   Yes 30 (33.3)   - Is your memory still affected?   Yes 3 (12.1)   - Was ECT helpful?   Very 48 (53.3)  Modest improvement 18 (20.0)  A little 8 (8.9)  Not at all 16 (17.8)   - Would you have ECT again if you became unwell and the doctor felt that it would be appropriate?   No 34 (37.8)  Yes 36 (40.0)  Maybe 20 (22.2)   - Were your complaints promptly attended to by ward staff?   No 34 (37.8)  Yes 54 (60.0) |
